# Supplementary material for: Insights into Triazolylidene Ligands Behaviour at a Di-Iron Site Related to [FeFe]-Hydrogenases
Source: MDPI journal article supplement (doi:10.3390/molecules27154700), 2022-07-22
Supplement: s1 [file s1]

## Supplementary materials

**Figure S1.** Geometry of complexes **1**, **2**.

**Figure S2.** IR spectrum of **1** in CH<sub>2</sub>Cl<sub>2</sub> ( $\nu(\text{CO})$  region)

**Figure S3.** <sup>1</sup>H NMR spectrum of **1** in CD<sub>2</sub>Cl<sub>2</sub>

**Figure S4.** <sup>13</sup>C{<sup>1</sup>H} NMR spectrum of **1** in CD<sub>2</sub>Cl<sub>2</sub>

**Figure S5.** (a) Cyclic voltammograms of **1** (1.9 mM) in CH<sub>2</sub>Cl<sub>2</sub>-[Bu<sub>4</sub>N][PF<sub>6</sub>] (0.2 M) under Ar at 0.2 Vs<sup>-1</sup>. (b)

Variation of the current intensity (*I*<sub>p</sub>) as a function of the square root of the scan rate ( $\nu^{1/2}$ ). (c) Scan rate dependence of the current for the reduction of **1** in CH<sub>2</sub>Cl<sub>2</sub>-[Bu<sub>4</sub>N][PF<sub>6</sub>] (0.2M) (vitreous carbon electrode).

**Figure S6.** A) thermodynamic speciation of **2**<sup>•-</sup> and B) optimized structure of **2a**<sup>•-</sup> with relevant geometrical parameters (distances in Å) in comparison with the ones of its neutral counterpart **2**. Atom colouring: Fe = orange, S = yellow, C = grey, N = blue, O = red. H atoms are omitted for clarity. For simplification, net charges on structures are not reported.

**Figure S7.** A) thermodynamic speciation of **2**<sup>2-</sup> and B) optimized structure of **2a**<sup>2-</sup> with relevant geometrical parameters (distances in Å). Atoms colouring: Fe = orange, S = yellow, C = grey, N = blue, O = red. H atoms are omitted for clarity. For simplification, net charges on structures are not reported.

**Table S1.** Calculated  $\nu(\text{CO})$  (cm<sup>-1</sup>) of complexes **1**, **2** and their most stable mono-anion and di-anion

**Table S2.** Crystallographic data and refinement parameters of **1.C<sub>4</sub>H<sub>8</sub>O**.

**Table S3.** XYZ Coordinates of selected optimized structures.

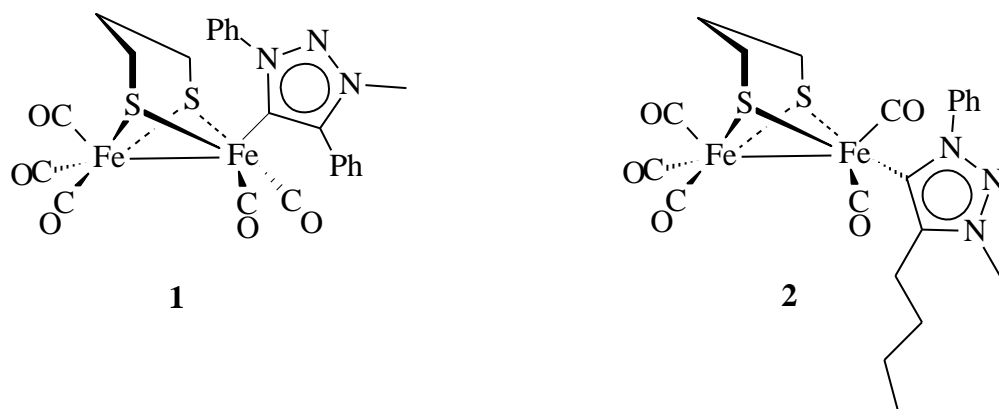

**Figure S1.** Geometry of complexes **1**, **2**.

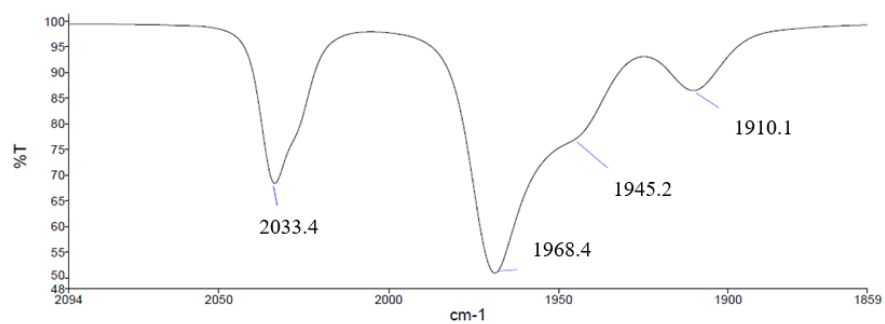

**Figure S2.** IR spectrum of **1** in CH<sub>2</sub>Cl<sub>2</sub> (ν(CO) region)

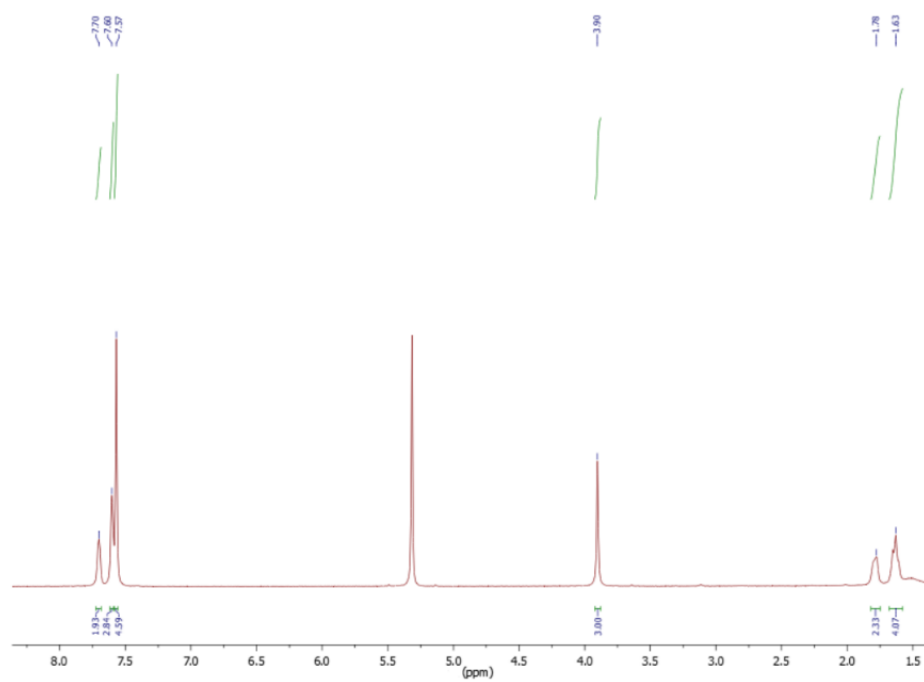

**Figure S3.**  $^1\text{H}$  NMR spectrum of **1** in  $\text{CD}_2\text{Cl}_2$

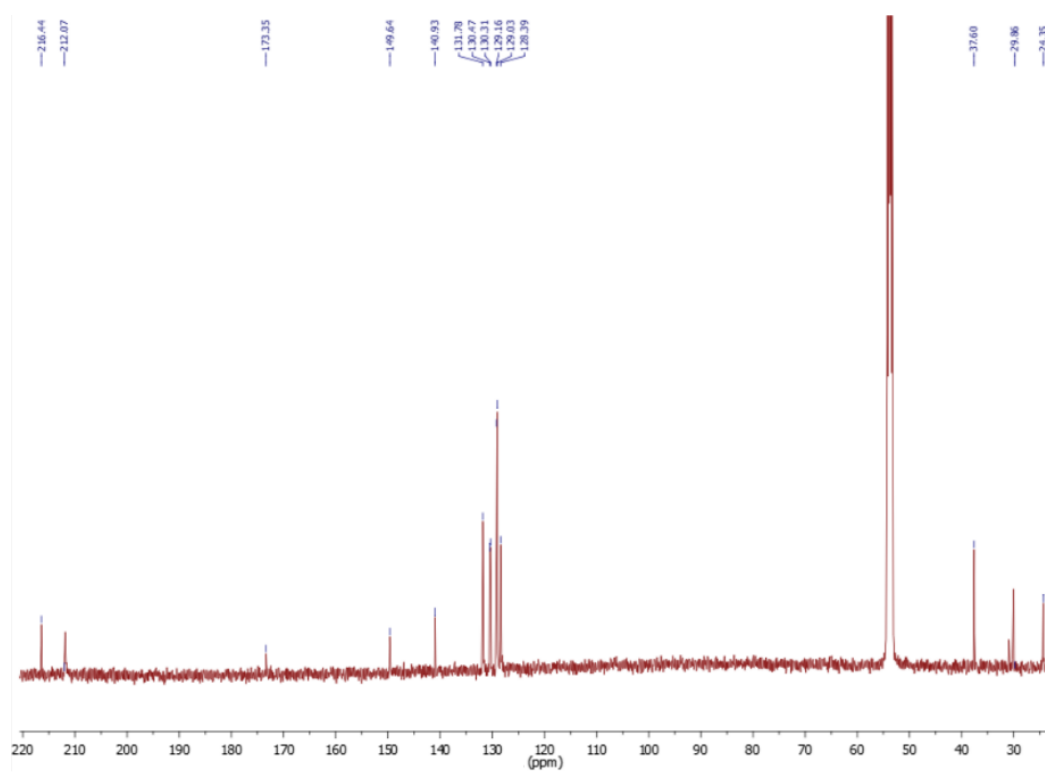

**Figure S4.**  $^{13}\text{C}\{^1\text{H}\}$  NMR spectrum of **1** in  $\text{CD}_2\text{Cl}_2$

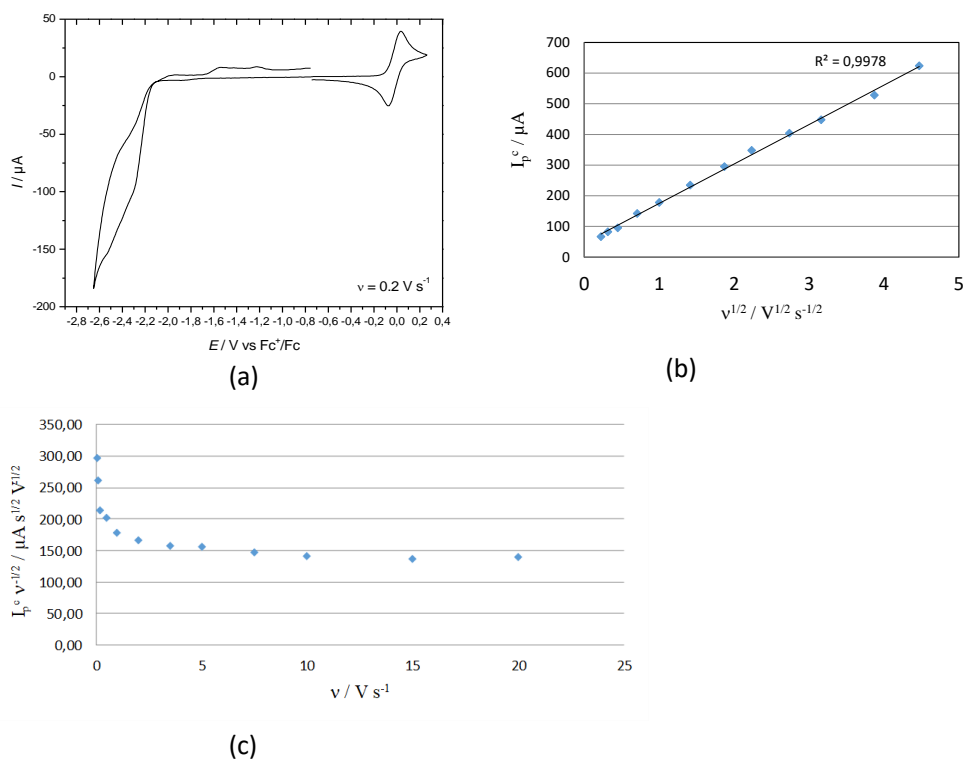

**Figure S5.** (a) Cyclic voltammograms of **1** (1.9 mM) in  $\text{CH}_2\text{Cl}_2$ -[Bu<sub>4</sub>N][PF<sub>6</sub>] (0.2 M) under Ar at  $0.2 \text{ V s}^{-1}$ . (b) Variation of the current intensity ( $I_p$ ) as a function of the square root of the scan rate ( $\nu^{1/2}$ ). (c) Scan rate dependence of the current for the reduction of **1** in  $\text{CH}_2\text{Cl}_2$ -[Bu<sub>4</sub>N][PF<sub>6</sub>] (0.2M) (vitreous carbon electrode).

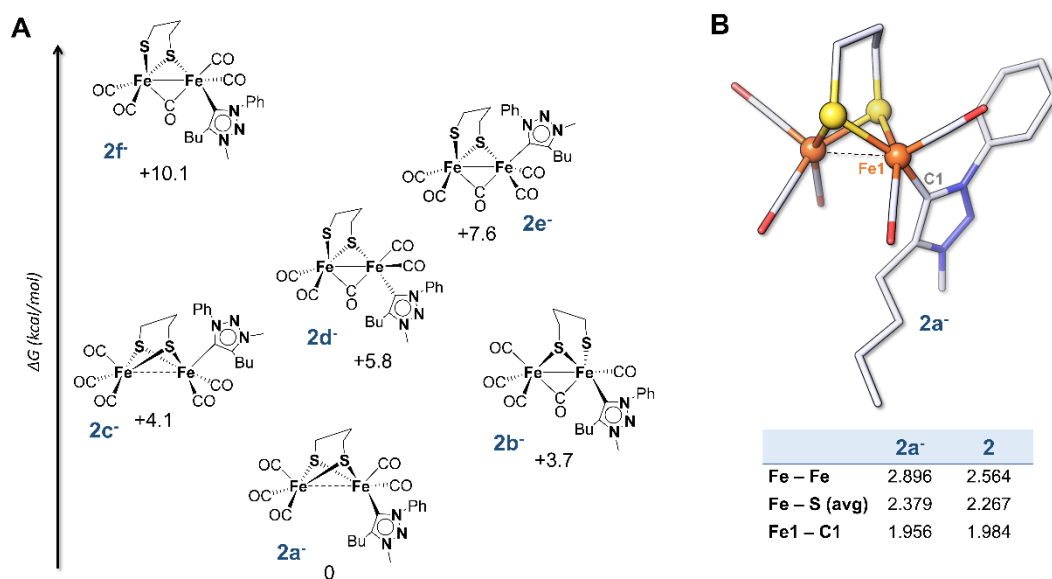

**Figure S6.** A) thermodynamic speciation of **2<sup>-</sup>** and B) optimized structure of **2a<sup>-</sup>** with relevant geometrical parameters (distances in Å) in comparison with the ones of its neutral counterpart **2**. Atom colouring: Fe = orange, S = yellow, C = grey, N = blue, O = red. H atoms are omitted for clarity. For simplification, net charges on structures are not reported.

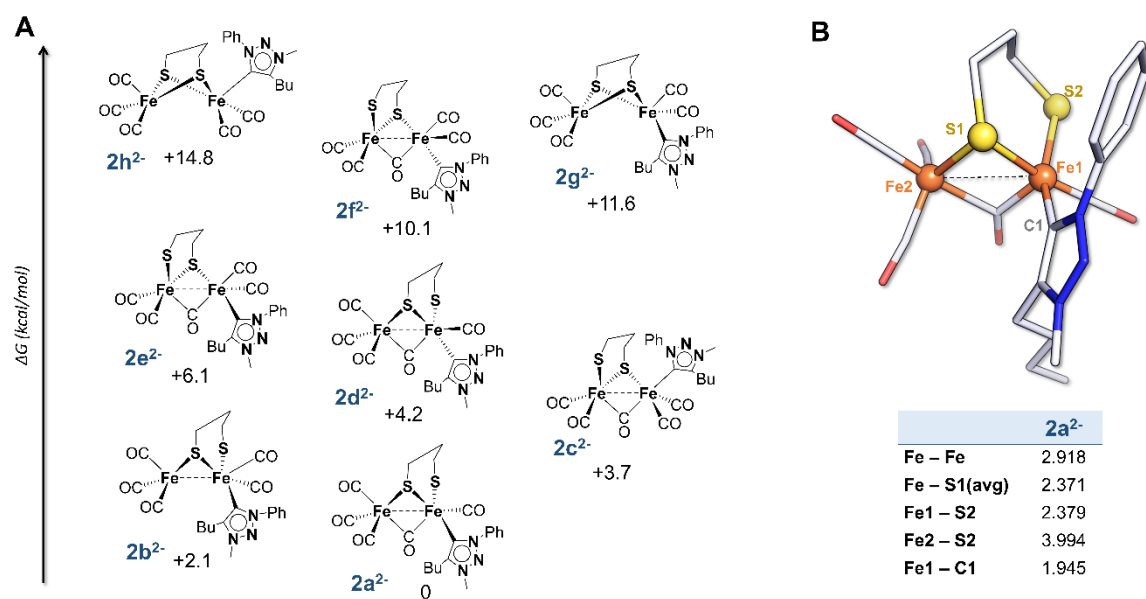

**Figure S7.** A) thermodynamic speciation of  $2^{2-}$  and B) optimized structure of  $2a^{2-}$  with relevant geometrical parameters (distances in Å). Atoms colouring: Fe = orange, S = yellow, C = grey, N = blue, O = red. H atoms are omitted for clarity. For simplification, net charges on structures are not reported.



**Table S1.** Calculated  $\nu(\text{CO})$  ( $\text{cm}^{-1}$ ) of complexes **1**, **2** and their most stable mono-anion and di-anion.

| species               | $\nu(\text{CO}) / \text{cm}^{-1}$ |
|-----------------------|-----------------------------------|
| <b>1</b>              | 1920, 1944, 1958, 1963, 2016      |
| <b>1<sup>-</sup></b>  | 1852, 1854, 1884, 1894, 1933      |
| <b>1<sup>2-</sup></b> | 1657, 1791, 1825, 1844, 1886      |
| <b>2</b>              | 1914, 1944, 1947, 1962, 2010      |
| <b>2<sup>-</sup></b>  | 1818, 1857, 1860, 1877, 1927      |
| <b>2<sup>2-</sup></b> | 1646, 1783, 1811, 1821, 1869      |

**Table S2.** Crystallographic data and refinement parameters of **1.C<sub>4</sub>H<sub>8</sub>O**

| <b>1.C<sub>4</sub>H<sub>8</sub>O</b>             |                                                                                              |
|--------------------------------------------------|----------------------------------------------------------------------------------------------|
| Empirical formula                                | C <sub>27</sub> H <sub>27</sub> Fe <sub>2</sub> N <sub>3</sub> O <sub>6</sub> S <sub>2</sub> |
| Formula weight                                   | 665.34                                                                                       |
| Temperature (°K)                                 | 170(2)                                                                                       |
| Wavelength (Å)                                   | 0.71073                                                                                      |
| Crystal system, space group                      | Triclinic, P-1                                                                               |
| Unit cell dimensions                             | a (Å)                                                                                        |
|                                                  | b (Å)                                                                                        |
|                                                  | c (Å)                                                                                        |
|                                                  | $\alpha$ (°)                                                                                 |
|                                                  | $\beta$ (°)                                                                                  |
|                                                  | $\gamma$ (°)                                                                                 |
| Volume (Å <sup>3</sup> )                         | 1424.9(2) Å <sup>3</sup>                                                                     |
| Z                                                | 2                                                                                            |
| Calculated density (Mg/m <sup>3</sup> )          | 1.551                                                                                        |
| Absorption coefficient (mm <sup>-1</sup> )       | 1.211                                                                                        |
| F(000)                                           | 684                                                                                          |
| Crystal colour                                   | Red                                                                                          |
| Crystal size (mm)                                | 0.18 x 0.08 x 0.01                                                                           |
| Theta range for data collection (°)              | 3.25 to 26.37                                                                                |
| Limiting indices                                 | $-9 \leq h \leq 11$ , $-12 \leq k \leq 10$ , $-17 \leq l \leq 20$                            |
| Reflections collected / unique                   | 9784 / 5817 [R(int) = 0.0847]                                                                |
| Completeness to theta = 26.37 (%)                | 99.7                                                                                         |
| Absorption correction                            | Analytical                                                                                   |
| Max. and min. transmission                       | 0.9880 and 0.8115                                                                            |
| Refinement method                                | Full-matrix least-squares on F <sup>2</sup>                                                  |
| Data / restraints / parameters                   | 5817 / 0 / 362                                                                               |
| Goodness-of-fit on F <sup>2</sup>                | 0.938                                                                                        |
| Final R indices [I > 2 $\sigma$ (I)]             | R <sub>1</sub> = 0.0636, wR <sub>2</sub> = 0.0956                                            |
| R indices (all data)                             | R <sub>1</sub> = 0.1275, wR <sub>2</sub> = 0.1242                                            |
| Largest diff. peak and hole (e.Å <sup>-3</sup> ) | 0.679 and -0.587                                                                             |

**Table S3.** XYZ Coordinates of selected optimized structures.**2**

|    |           |           |          |
|----|-----------|-----------|----------|
| C  | 4.938346  | 5.239871  | 4.259887 |
| C  | 3.207701  | 4.094470  | 2.723169 |
| C  | 1.370404  | 6.066821  | 0.929079 |
| C  | 0.400623  | 7.251738  | 2.974927 |
| C  | 1.899799  | 8.770558  | 1.282333 |
| C  | 5.268087  | 7.984426  | 1.810301 |
| H  | 6.201326  | 7.628939  | 1.353661 |
| H  | 4.880957  | 8.810929  | 1.198017 |
| C  | 5.512219  | 8.421556  | 3.243295 |
| H  | 5.933221  | 7.586760  | 3.820819 |
| H  | 6.278547  | 9.215876  | 3.232648 |
| C  | 4.280600  | 8.959592  | 3.947580 |
| H  | 3.863470  | 9.830993  | 3.424407 |
| H  | 4.527991  | 9.260547  | 4.975211 |
| C  | 2.125477  | 5.109689  | 4.943036 |
| C  | 0.852978  | 4.515227  | 4.852164 |
| C  | 0.131653  | 3.943896  | 3.683223 |
| H  | 0.608843  | 4.356639  | 2.786201 |
| H  | -0.910815 | 4.301082  | 3.671429 |
| C  | 0.153678  | 2.405981  | 3.616509 |
| H  | 1.193088  | 2.055329  | 3.709872 |
| H  | -0.399042 | 1.983010  | 4.471082 |
| C  | -0.448691 | 1.889283  | 2.307381 |
| H  | 0.110009  | 2.327276  | 1.463871 |
| H  | -1.485238 | 2.255882  | 2.215267 |
| C  | -0.427571 | 0.362582  | 2.206066 |
| H  | 0.602468  | -0.022130 | 2.258537 |
| H  | -0.866209 | 0.017865  | 1.258359 |
| H  | -0.998508 | -0.097247 | 3.027471 |
| C  | -0.989149 | 4.029740  | 6.540978 |
| H  | -1.215138 | 4.471321  | 7.515391 |
| H  | -0.962229 | 2.936848  | 6.620566 |
| H  | -1.744714 | 4.332136  | 5.807958 |
| C  | 3.290762  | 6.023893  | 7.009288 |
| C  | 3.176603  | 7.363717  | 7.384434 |
| H  | 2.275461  | 7.920983  | 7.134182 |
| C  | 4.239280  | 7.968506  | 8.059028 |
| H  | 4.166778  | 9.016946  | 8.350173 |
| C  | 5.392211  | 7.232311  | 8.356597 |
| H  | 6.222937  | 7.709754  | 8.877964 |
| C  | 5.478747  | 5.884325  | 7.994707 |
| H  | 6.372150  | 5.307394  | 8.234544 |
| C  | 4.420779  | 5.270455  | 7.319181 |
| H  | 4.471689  | 4.222651  | 7.026138 |
| N  | 0.316211  | 4.528333  | 6.112442 |
| N  | 1.123400  | 5.062937  | 7.019797 |
| N  | 2.207732  | 5.399432  | 6.296501 |
| O  | 6.012182  | 4.940664  | 4.616700 |
| O  | 3.124950  | 3.060337  | 2.186181 |
| O  | 0.969779  | 5.317588  | 0.132313 |
| O  | -0.621309 | 7.283506  | 3.531697 |
| O  | 1.855760  | 9.780065  | 0.703165 |
| S  | 4.086010  | 6.570372  | 1.578766 |
| S  | 2.885095  | 7.758006  | 4.159062 |
| Fe | 3.398318  | 5.636499  | 3.535756 |
| Fe | 1.960573  | 7.218012  | 2.140070 |

**2a**

|    |           |           |          |
|----|-----------|-----------|----------|
| C  | 5.110047  | 5.211432  | 4.319062 |
| C  | 3.322962  | 3.957354  | 2.798160 |
| C  | 1.262310  | 6.149850  | 0.875663 |
| C  | 0.314028  | 7.282220  | 2.893092 |
| C  | 1.905220  | 8.874942  | 1.277227 |
| C  | 5.174094  | 7.919247  | 1.828173 |
| H  | 6.130806  | 7.592620  | 1.395754 |
| H  | 4.770508  | 8.733592  | 1.208114 |
| C  | 5.383079  | 8.380339  | 3.262593 |
| H  | 5.787920  | 7.547544  | 3.855681 |
| H  | 6.147538  | 9.178484  | 3.259214 |
| C  | 4.135771  | 8.912939  | 3.950001 |
| H  | 3.703205  | 9.754120  | 3.388372 |
| H  | 4.387373  | 9.257061  | 4.964389 |
| C  | 2.221523  | 5.003814  | 4.999358 |
| C  | 0.910616  | 4.501101  | 4.870551 |
| C  | 0.215998  | 3.947719  | 3.678505 |
| H  | 0.746778  | 4.349771  | 2.805096 |
| H  | -0.814491 | 4.334943  | 3.626547 |
| C  | 0.200722  | 2.410010  | 3.618199 |
| H  | 1.232603  | 2.040524  | 3.721881 |
| H  | -0.370619 | 1.999896  | 4.468592 |
| C  | -0.394335 | 1.899720  | 2.303418 |
| H  | 0.181857  | 2.329732  | 1.467633 |
| H  | -1.424314 | 2.281367  | 2.197340 |
| C  | -0.393843 | 0.372359  | 2.202373 |
| H  | 0.630279  | -0.025097 | 2.274659 |
| H  | -0.819585 | 0.031689  | 1.246966 |
| H  | -0.985303 | -0.080095 | 3.013876 |
| C  | -1.049576 | 4.244423  | 6.466428 |
| H  | -1.266893 | 4.688687  | 7.441672 |
| H  | -1.138132 | 3.152923  | 6.521936 |
| H  | -1.745139 | 4.634409  | 5.714912 |
| C  | 3.332197  | 5.976575  | 7.051769 |
| C  | 3.197279  | 7.304333  | 7.461110 |
| H  | 2.280383  | 7.845332  | 7.233064 |
| C  | 4.261191  | 7.919726  | 8.125979 |
| H  | 4.171086  | 8.960002  | 8.441759 |
| C  | 5.441142  | 7.207259  | 8.372339 |
| H  | 6.273625  | 7.693697  | 8.883470 |
| C  | 5.554410  | 5.872828  | 7.967862 |
| H  | 6.471869  | 5.315748  | 8.160744 |
| C  | 4.494399  | 5.249748  | 7.303325 |
| H  | 4.566251  | 4.215178  | 6.971747 |
| N  | 0.311785  | 4.616356  | 6.095317 |
| N  | 1.108802  | 5.135102  | 7.026118 |
| N  | 2.254016  | 5.350626  | 6.343254 |
| O  | 6.199085  | 4.846889  | 4.610080 |
| O  | 3.297221  | 2.903060  | 2.263494 |
| O  | 0.857353  | 5.395747  | 0.068266 |
| O  | -0.720413 | 7.291051  | 3.454152 |
| O  | 1.734347  | 9.876463  | 0.677119 |
| S  | 4.013256  | 6.481911  | 1.598289 |
| S  | 2.778274  | 7.673160  | 4.184025 |
| Fe | 3.513577  | 5.484401  | 3.612213 |
| Fe | 1.856140  | 7.289338  | 2.068453 |

**2a<sup>2-</sup>**

|    |           |           |           |
|----|-----------|-----------|-----------|
| C  | 2.723291  | 4.031805  | 3.867553  |
| C  | 1.194198  | 5.489242  | 2.288219  |
| C  | -0.945464 | 7.149238  | 2.169794  |
| C  | 1.589820  | 7.423327  | 0.618220  |
| C  | 0.537025  | 9.303940  | 2.028731  |
| C  | 4.626238  | 7.777383  | 2.397046  |
| H  | 5.607603  | 7.862403  | 1.906322  |
| H  | 3.854119  | 8.122213  | 1.692718  |
| C  | 4.592292  | 8.629140  | 3.670459  |
| H  | 5.275067  | 9.493234  | 3.559719  |
| H  | 4.965920  | 8.026447  | 4.513068  |
| C  | 3.214493  | 9.180857  | 4.006095  |
| H  | 2.884018  | 9.886055  | 3.230413  |
| H  | 3.256255  | 9.722832  | 4.963376  |
| C  | 1.021702  | 5.415323  | 5.188387  |
| C  | -0.279327 | 4.880851  | 5.270518  |
| C  | -1.133785 | 4.293479  | 4.205497  |
| H  | -1.008799 | 4.910940  | 3.308459  |
| H  | -2.195966 | 4.351244  | 4.490958  |
| C  | -0.754003 | 2.842635  | 3.863204  |
| H  | 0.311544  | 2.823689  | 3.593457  |
| H  | -0.877191 | 2.199172  | 4.752471  |
| C  | -1.579230 | 2.295204  | 2.697835  |
| H  | -1.441836 | 2.968780  | 1.836776  |
| H  | -2.652154 | 2.325553  | 2.956955  |
| C  | -1.178429 | 0.869798  | 2.309498  |
| H  | -0.118355 | 0.831009  | 2.015498  |
| H  | -1.776027 | 0.496092  | 1.464362  |
| H  | -1.315805 | 0.173854  | 3.152497  |
| C  | -1.945902 | 4.536090  | 7.156459  |
| H  | -1.882060 | 4.672802  | 8.239574  |
| H  | -2.755527 | 5.153891  | 6.749463  |
| H  | -2.131178 | 3.481400  | 6.922563  |
| C  | 2.417427  | 6.394571  | 7.065600  |
| C  | 2.262574  | 7.367988  | 8.057082  |
| H  | 1.263841  | 7.628833  | 8.404990  |
| C  | 3.393659  | 8.019109  | 8.558294  |
| H  | 3.275154  | 8.789406  | 9.322073  |
| C  | 4.666302  | 7.699974  | 8.071136  |
| H  | 5.545384  | 8.221747  | 8.453361  |
| C  | 4.805902  | 6.714507  | 7.086974  |
| H  | 5.792546  | 6.458953  | 6.698096  |
| C  | 3.684919  | 6.050965  | 6.586353  |
| H  | 3.777132  | 5.313864  | 5.788256  |
| N  | -0.671421 | 4.950615  | 6.578978  |
| N  | 0.247777  | 5.481089  | 7.382014  |
| N  | 1.261830  | 5.751408  | 6.524350  |
| O  | 3.028199  | 2.885738  | 3.998781  |
| O  | 0.818164  | 4.598284  | 1.556191  |
| O  | 2.048313  | 7.337118  | -0.476249 |
| O  | -2.110312 | 6.951886  | 1.995588  |
| O  | 0.401251  | 10.478195 | 1.932808  |
| S  | 4.367555  | 5.977152  | 2.700021  |
| S  | 1.854204  | 7.930461  | 4.231384  |
| Fe | 2.286472  | 5.676717  | 3.734524  |
| Fe | 0.749440  | 7.573310  | 2.136631  |

1

|    |           |           |           |
|----|-----------|-----------|-----------|
| C  | 3.805549  | 8.072808  | 3.204037  |
| C  | 4.172401  | 6.874940  | 5.327847  |
| C  | 0.718958  | 8.801030  | 3.632486  |
| C  | 1.120550  | 7.841379  | 5.951840  |
| C  | -0.824008 | 6.677690  | 4.345491  |
| C  | 1.146765  | 3.783254  | 4.205717  |
| H  | 1.538520  | 2.921365  | 4.761206  |
| H  | 0.058134  | 3.822938  | 4.351576  |
| C  | 1.507654  | 3.676497  | 2.736023  |
| H  | 2.599557  | 3.630863  | 2.626748  |
| H  | 1.105778  | 2.724165  | 2.349771  |
| C  | 0.967795  | 4.805229  | 1.879469  |
| H  | -0.126533 | 4.878884  | 1.949043  |
| H  | 1.233369  | 4.646836  | 0.825374  |
| C  | 4.585652  | 5.283549  | 3.133523  |
| C  | 5.006048  | 3.997197  | 3.540130  |
| C  | 6.794006  | 2.374294  | 2.699032  |
| H  | 6.269630  | 1.586563  | 2.146274  |
| H  | 6.937937  | 2.067622  | 3.739505  |
| H  | 7.757638  | 2.585470  | 2.226755  |
| C  | 5.459749  | 6.664080  | 1.189572  |
| C  | 4.429349  | 6.884828  | 0.275903  |
| H  | 3.594164  | 6.189175  | 0.221115  |
| C  | 4.483193  | 8.015080  | -0.540917 |
| H  | 3.679314  | 8.204797  | -1.252757 |
| C  | 5.564506  | 8.898408  | -0.446144 |
| H  | 5.600996  | 9.782535  | -1.083785 |
| C  | 6.598434  | 8.652348  | 0.463642  |
| H  | 7.440191  | 9.341455  | 0.537730  |
| C  | 6.550574  | 7.527680  | 1.290726  |
| H  | 7.336508  | 7.325822  | 2.018407  |
| C  | 4.520332  | 3.103963  | 4.599905  |
| C  | 4.502946  | 3.518241  | 5.941301  |
| H  | 4.893403  | 4.498591  | 6.206625  |
| C  | 4.000438  | 2.673144  | 6.932232  |
| H  | 3.986894  | 3.008764  | 7.969780  |
| C  | 3.511468  | 1.406294  | 6.596894  |
| H  | 3.111347  | 0.751440  | 7.372215  |
| C  | 3.537747  | 0.980170  | 5.264197  |
| H  | 3.153657  | -0.004376 | 4.994165  |
| C  | 4.036833  | 1.824086  | 4.270923  |
| H  | 4.024039  | 1.499920  | 3.229579  |
| N  | 5.409099  | 5.506297  | 2.041148  |
| N  | 6.274838  | 4.513837  | 1.755797  |
| N  | 6.007729  | 3.608834  | 2.682483  |
| O  | 4.085819  | 9.155769  | 2.869522  |
| O  | 4.774460  | 7.128688  | 6.297807  |
| O  | 0.604714  | 9.865516  | 3.177713  |
| O  | 1.284051  | 8.282264  | 7.016250  |
| O  | -1.943379 | 6.355378  | 4.374055  |
| S  | 1.624458  | 6.495864  | 2.269808  |
| S  | 1.845517  | 5.247879  | 5.102062  |
| Fe | 3.275765  | 6.535699  | 3.867759  |
| Fe | 0.877019  | 7.177289  | 4.327069  |

**1a<sup>-</sup>**

|    |           |           |          |
|----|-----------|-----------|----------|
| Fe | 3.582549  | 6.914352  | 4.316609 |
| Fe | 0.824167  | 7.177838  | 3.393161 |
| S  | 1.735353  | 5.713954  | 4.955596 |
| C  | 1.762491  | 4.036024  | 4.153074 |
| C  | 2.722531  | 3.869303  | 2.983554 |
| C  | 2.464965  | 4.775461  | 1.790704 |
| S  | 2.715763  | 6.591768  | 2.123503 |
| C  | 3.549815  | 7.790701  | 5.827434 |
| O  | 3.613217  | 8.261765  | 6.909487 |
| C  | 4.779146  | 8.173178  | 3.453613 |
| C  | 6.015628  | 7.943109  | 2.810652 |
| N  | 6.451055  | 9.143340  | 2.313595 |
| N  | 5.617044  | 10.143206 | 2.566895 |
| N  | 4.620515  | 9.535883  | 3.255048 |
| C  | 6.759871  | 6.692380  | 2.610635 |
| C  | 8.053791  | 6.520343  | 3.125707 |
| C  | 8.726463  | 5.308347  | 2.951340 |
| C  | 8.113273  | 4.257292  | 2.262014 |
| C  | 6.826432  | 4.427044  | 1.738441 |
| C  | 6.150887  | 5.633643  | 1.917228 |
| C  | 3.500529  | 10.367229 | 3.609952 |
| C  | 2.583057  | 10.701056 | 2.614042 |
| C  | 1.514026  | 11.542212 | 2.930982 |
| C  | 1.374855  | 12.038782 | 4.230472 |
| C  | 2.305470  | 11.697017 | 5.217538 |
| C  | 3.380167  | 10.859988 | 4.909186 |
| C  | 7.672606  | 9.416538  | 1.558588 |
| C  | 4.793849  | 5.708696  | 4.750748 |
| O  | 5.535089  | 4.966904  | 5.299511 |
| C  | 0.424058  | 8.284432  | 2.102853 |
| O  | 0.137278  | 8.969725  | 1.192095 |
| C  | 0.581579  | 8.343383  | 4.694711 |
| O  | 0.314292  | 9.077283  | 5.573854 |
| C  | -0.565421 | 6.134430  | 3.132557 |
| O  | -1.578447 | 5.532066  | 3.045242 |
| H  | 2.027503  | 3.330431  | 4.953628 |
| H  | 0.725558  | 3.833230  | 3.847839 |
| H  | 3.750320  | 4.039250  | 3.335573 |
| H  | 2.665778  | 2.818803  | 2.644660 |
| H  | 1.438204  | 4.660246  | 1.414524 |
| H  | 3.161827  | 4.519982  | 0.978581 |
| H  | 7.860781  | 8.569397  | 0.890749 |
| H  | 8.521106  | 9.542091  | 2.241567 |
| H  | 7.516582  | 10.332844 | 0.981801 |
| H  | 2.701524  | 10.291522 | 1.611123 |
| H  | 0.783070  | 11.799606 | 2.163966 |
| H  | 0.533117  | 12.687898 | 4.476469 |
| H  | 2.188742  | 12.073952 | 6.234647 |
| H  | 4.112019  | 10.588560 | 5.667598 |
| H  | 8.525126  | 7.324409  | 3.691680 |
| H  | 6.343690  | 3.610731  | 1.198862 |
| H  | 5.141210  | 5.776253  | 1.533769 |
| H  | 9.724662  | 5.181052  | 3.372631 |
| H  | 8.634369  | 3.306389  | 2.138384 |

**1a<sup>2-</sup>**

|   |          |          |          |
|---|----------|----------|----------|
| N | 5.777761 | 3.535560 | 2.588987 |
| C | 5.006487 | 3.966504 | 3.644626 |
| C | 4.647625 | 5.322058 | 3.400718 |

|    |           |           |           |
|----|-----------|-----------|-----------|
| N  | 5.245214  | 5.512595  | 2.151306  |
| N  | 5.942955  | 4.461934  | 1.656017  |
| Fe | 3.769325  | 6.746265  | 4.541326  |
| Fe | 1.146517  | 7.478401  | 3.735652  |
| S  | 1.726362  | 5.576739  | 4.929933  |
| C  | 1.474537  | 3.965724  | 4.053732  |
| C  | 1.630360  | 3.937015  | 2.541040  |
| C  | 0.474557  | 4.599101  | 1.789770  |
| S  | 0.596273  | 6.435568  | 1.631155  |
| C  | 4.640248  | 3.054237  | 4.731455  |
| C  | 4.684804  | 3.479826  | 6.069529  |
| C  | 4.277079  | 2.628834  | 7.097665  |
| C  | 3.827443  | 1.334764  | 6.810460  |
| C  | 3.787452  | 0.896759  | 5.482032  |
| C  | 4.183525  | 1.750409  | 4.450922  |
| C  | 5.205435  | 6.683390  | 1.326360  |
| C  | 3.970656  | 7.276828  | 1.059435  |
| C  | 3.941022  | 8.419263  | 0.256792  |
| C  | 5.124097  | 8.956353  | -0.264486 |
| C  | 6.351885  | 8.341466  | 0.006821  |
| C  | 6.397154  | 7.198592  | 0.812801  |
| C  | 6.472896  | 2.262318  | 2.401635  |
| C  | 4.664101  | 8.086652  | 3.892055  |
| O  | 5.284613  | 9.051519  | 3.593143  |
| C  | 4.483494  | 6.719318  | 6.118030  |
| O  | 4.991275  | 6.877353  | 7.187072  |
| C  | 1.320949  | 8.956073  | 2.835867  |
| O  | 1.414316  | 9.983935  | 2.259457  |
| C  | -0.338276 | 7.845327  | 4.531629  |
| O  | -1.325508 | 8.183480  | 5.101573  |
| C  | 2.407726  | 8.187674  | 5.011184  |
| O  | 2.445438  | 9.153925  | 5.744886  |
| H  | 2.183036  | 3.277553  | 4.528795  |
| H  | 0.459293  | 3.638542  | 4.329952  |
| H  | 2.579044  | 4.414944  | 2.256826  |
| H  | 1.695770  | 2.874965  | 2.236226  |
| H  | -0.475884 | 4.328964  | 2.280733  |
| H  | 0.432149  | 4.211569  | 0.760001  |
| H  | 5.842408  | 1.558402  | 1.845223  |
| H  | 6.713988  | 1.845233  | 3.383917  |
| H  | 7.390442  | 2.461240  | 1.839166  |
| H  | 3.042523  | 6.861245  | 1.464395  |
| H  | 2.979881  | 8.892047  | 0.050819  |
| H  | 5.090399  | 9.855013  | -0.883630 |
| H  | 7.277361  | 8.756439  | -0.395860 |
| H  | 7.345037  | 6.717115  | 1.054210  |
| H  | 5.019840  | 4.490832  | 6.284742  |
| H  | 4.311131  | 2.979690  | 8.130537  |
| H  | 3.503650  | 0.673388  | 7.615950  |
| H  | 3.423584  | -0.104275 | 5.244121  |
| H  | 4.090701  | 1.417898  | 3.416777  |
